# Supplementary material
Source: publisher figshare collection journal article supplement (https://tandf.figshare.com/ndownloader/files/13708589)
Supplement: Supplementary file 1 [file 13708589]

## Sheet: Foglio1
		LOADINGS 2014
SOURCE	Variable	axis 1	axis 2
International Institute for Strategic Studies, The Military Balance.	Armed forces personnel (% of total labor force)	-0.159888	-0.419268
Stockholm International Peace Research Institute (SIPRI).	Arms imports (SIPRI trend indicator values)	0.0879316	-0.285594
World Population Prospect 2015, UN population division	Child dependency ratio 0-14 per 100 population 15-64;	0.771707	-0.00987467
Freedom House	Civil Liberties	0.501374	-0.484926
Trasparency International	Corruption Index	0.540992	-0.480638
Food and Agriculture Organization	Crop production index (2004-2006 = 100)	0.287525	0.0864767
Food and Agriculture Organization	Depth of the food deficit (kilocalories per person per day)	0.589291	-0.0228588
EM-DAT	Disasters: Deaths as consequence of natural hazards	0.0520062	-0.036856
EM-DAT	Disasters: People affected by natural hazards	0.150972	0.0763466
International Energy Agency (IEA Statistics OECD/IE)	Electric power consumption (kWh per capita)	0.574155	-0.363676
Data set compiled by Alesina, Alberto et al. 2003. “Fractionalization”. Journal of Economic Growth 8 (June): 155-194.	Ethnic Fractionalization Index	0.513773	0.00616883
UN Population Division	Feminity rate (females per 100 males)	-0.284473	0.13831
UN Population Division	Fertility rate, total (births per woman)	0.741759	0.0341781
Food and Agriculture Organization	Food production index (2004-2006 = 100)	0.416228	-0.0307007
UN – Statistics Division (National Accounts)	GDP per capita (constant 2005 U$)	0.515663	-0.487085
World Bank/OECD	GINI index of income distribution	0.353844	0.0170062
UN – Statistics Division (National Accounts)	GNI per capita (constant 2005 US$)	0.516534	-0.489686
UNESCO	Government expenditure on education as % of GDP	-0.178484	0.17062
UNESCO	Government expenditure on education as % of total government expenditure	0.229865	0.0223564
UNESCO	Gross enrolment ratio, primary both sexes)	0.051989	0.147899
UNESCO	Gross enrolment ratio, secondary, both sexes	0.748861	-0.0953777
UNESCO	Gross enrolment ratio, tertiary, both sexes	0.717613	-0.171009
World Health Organization	Health Expenditure (%GDP)	0.558676	-0.449801
World Health Organization	Health Expenditure (PPP, constant 2011 intnl $, per capita)	0.361112	-0.364161
UN	Human Development Index (HDI)	0.792978	-0.124149
(WHO/UNICEF Joint Monitoring Programme (JMP) for Water Supply and Sanitation)	Improved sanitation facilities (% of population with access)	0.759494	0.103466
(WHO/UNICEF Joint Monitoring Programme (JMP) for Water Supply and Sanitation)	Improved water source (% of population with access)	0.668634	-0.0363428
International Telecommunication Union, World Telecommunication/ICT Development Report and database, and World Bank estimates	Internet users (per 100 people)	0.729923	-0.239311
International Labour Organization	Labor force participation rate for ages 15-24, female	-0.299996	-0.509143
International Labour Organization	Labor force participation rate, female (ages 15+)	-0.321059	-0.500919
Data set compiled by Alesina, Alberto et al. 2003. “Fractionalization”. Journal of Economic Growth 8 (June): 155-194.	Language Fractionalization Index	0.491527	0.0965369
UN Population Division	Life expectancy, male	0.776221	-0.0204961
UN Population Division	Life expectancyfemale	0.750282	-0.0701301
UNESCO	Literacy rate, population 15+ years, both sexes (%)	0.682438	0.0179061
Food and Agriculture Organization	Livestock production index (2004-2006 = 100)	0.329313	-0.0758531
World Health Organization	Malaria presumed and confirmed cases (per1000 population)	0.511061	0.259298
World Health Organization	Malnutrition prevalence, weight for age (% children under 5)	0.608752	-0.103814
World Health Organization	Maternal mortality ratio (per 100,000 live births),	0.717379	0.1343
Stockholm International Peace Research Institute (SIPRI),.	Military expenditure (% of central government expenditure)	0.28007	-0.42847
International Telecommunication Union, World Telecommunication/ICT Development Report and database, and World Bank estimates	Mobile cellular subscriptions (per 100 people)	-0.517071	0.00244976
World Population Prospect 2015, UN population division	Mortality rate, adult, female (per 1,000 female adults)	0.688993	0.0700767
UN Population Division.	Mortality rate, adult, male (per 1,000 male adults)	0.31095	0.0789686
UN Population Division.	Mortality rate, infant (per 1,000 live births)	0.7623	-0.0081204
UN Population Division.	Mortality rate, neonatal (per 1,000 live births)	0.639191	-0.0272786
UN Population Division.	Mortality rate, under-5 (per 1,000 live births)	0.239916	0.0319079
UN Population Division.	Mortality rate, female 15-34	0.745392	-0.0745576
UN Population Division.	Mortality rate, male 15-34	0.755031	0.0369877
PEW Research Center	Muslim Population (% total popul.)	0.202753	-0.480287
UN Population Division.	Net reproduction rate (surviving daughters per woman)	0.718495	-0.00149552
Freedom House	Political Rights	0.467734	-0.457046
UN Population Division.	Population 15-34 female, annual data (%)	0.774959	-0.0816499
UN Population Division.	Population 15-34 male, annual data (%)	0.541499	-0.38152
UN Population Division.	Population ages 0-14 (% of total population)	0.485983	-0.406632
UN Population Division.	Population density	-0.0855209	-0.0195565
UN Population Division.	Population growth rate	-0.610635	0.0185808
UNESCO	Pupil teacher ratio, primary education	0.711222	0.0694346
Data set compiled by Alesina, Alberto et al. 2003. “Fractionalization”. Journal of Economic Growth 8 (June): 155-194.	Religion Fractionalization Index	0.137152	0.34351
World Bank elaboration from World Urbanization Prospects, UN	Rural population (% of total population)	0.596216	-0.0475228
Freedom House	Status	0.458246	-0.438148
World Bank	Trade Indicator : (Exportation + importation)/ GDP $2005 x 100	-0.1981	5.30253e-05
International Labour Organization	Unemployment, total (% of total labor force)	-0.289009	-0.220601
International Labour Organization	Unemployment, youth male (% of male labor force	-0.0881531	-0.360539
UNAIDS	Women's share of population ages 15+ living with HIV	0.338001	0.0731901
World Health Organization and UNAIDS	Deaths due to HIV/AIDS (per 100000 population)	0.639154	-0.138209
UNHCR	Refugee population by country or territory of asylum (scaled by total population)	-0.0193758	-0.28106
